# Supplementary material
Source: PubMed Central journal article supplement (PMC6639012)
Supplement: NIHMS836634-supplement-Supplementary_Appendix.pdf [file NIHMS836634-supplement-Supplementary_Appendix.pdf]

## Supplementary Appendix

This appendix has been provided by the authors to give readers additional information about their work.

Supplement to: The Consortium on Lithium Genetics. Variant *GADL1* and response to lithium in bipolar I disorder. *N Engl J Med* 2014;370:1855-60. DOI: 10.1056/NEJMc1401817

## The Consortium on Lithium Genetics (ConLiGen) - alphabetical list of contributors

| <b>First</b>  | <b>Last</b> | <b>Dept</b>                                                                                                          | <b>Institution, City</b>                                                                           | <b>Country</b> |
|---------------|-------------|----------------------------------------------------------------------------------------------------------------------|----------------------------------------------------------------------------------------------------|----------------|
| Mazda         | Adli        | Department of Psychiatry and Psychotherapy, Charité - Universitätsmedizin Berlin                                     | Campus Charité Mitte & Fliedner Klinik Berlin                                                      | Germany        |
| Kazufumi      | Akiyama     | Department of Biological Psychiatry and Neuroscience                                                                 | Dokkyo Medical University School of Medicine, Mibu                                                 | Japan          |
| Nirmala       | Akula       | Human Genetics Branch                                                                                                | National Institute of Mental Health Intramural Research Program, Bethesda, MD                      | United States  |
| Martin        | Alda        | Department of Psychiatry                                                                                             | Dalhousie University, Halifax, Nova Scotia                                                         | Canada         |
| Raffaella     | Ardau       | Unit of Clinical Pharmacology, Hospital University Agency                                                            | University of Cagliari, Cagliari                                                                   | Italy          |
| Bárbara       | Arias       | Department of Biologia Animal, Unitat d'Antropologia, Facultat de Biologia, Universitat de Barcelona, IBUB, CIBERSAM | Instituto de Salud Carlos III, Barcelona, Catalonia                                                | Spain          |
| Jean-Michel   | Aubry       | Département de Psychiatrie                                                                                           | HUG - Hôpitaux Universitaires de Genève, Geneva                                                    | Switzerland    |
| Lena          | Backlund    | Department of Molecular Medicine and Surgery                                                                         | Karolinska Institutet and Center for Molecular Medicine, Karolinska University Hospital, Stockholm | Sweden         |
| Claudio E. M. | Banzato     | Department of Psychiatry                                                                                             | University of Campinas (Unicamp), Campinas                                                         | Brazil         |
| Michael       | Bauer       | Department of Psychiatry and Psychotherapy                                                                           | University Hospital Carl Gustav Carus, Technische Universität Dresden, Dresden                     | Germany        |
| Bernhard T.   | Baune       | Discipline of Psychiatry                                                                                             | University of Adelaide, Adelaide                                                                   | Australia      |
| Frank         | Bellivier   | INSERM UMR-S 1144 - Pôle de Psychiatrie                                                                              | AP-HP, Groupe Hospitalier Lariboisière-F. Widal, Paris                                             | France         |

|            |                    |                                                                            |                                                                               |                |
|------------|--------------------|----------------------------------------------------------------------------|-------------------------------------------------------------------------------|----------------|
| Antonio    | Benabarre          | Bipolar Disorders Program, Institute of Neuroscience, Hospital Clinic      | University of Barcelona, IDIBAPS, CIBERSAM, Barcelona, Catalonia              | Spain          |
| Susanne A. | Bengesser          | Special outpatient center for bipolar affective disorder                   | Medical University of Graz, Graz                                              | Austria        |
| Joanna M.  | Biernacka          | Department of Psychiatry and Psychology                                    | Mayo Clinic, Rochester, MN                                                    | United States  |
| Clara      | Brichant-Petitjean | INSERM UMR-S 1144 - Pôle de Psychiatrie                                    | AP-HP, Groupe Hospitalier Lariboisière-F. Widal, Paris                        | France         |
| Elise T.   | Bui                | Human Genetics Branch                                                      | National Institute of Mental Health Intramural Research Program, Bethesda, MD | United States  |
| Hsi-Chung  | Chen               | Department of Psychiatry & Center of Sleep Disorders                       | National Taiwan University Hospital, Taipei                                   | Taiwan         |
| Caterina   | Chillotti          | Unit of Clinical Pharmacology, Hospital University Agency                  | University of Cagliari, Cagliari                                              | Italy          |
| Sven       | Cichon             | Institute of Human Genetics, Department of Genomics, Life and Brain Center | University of Bonn, Bonn                                                      | Germany        |
| Francesc   | Colom              | Bipolar Disorders Program, Institute of Neuroscience, Hospital Clinic      | University of Barcelona, IDIBAPS, CIBERSAM, Barcelona, Catalonia              | Spain          |
| David      | Cousins            | Campus for Ageing and Vitality                                             | Newcastle University, Newcastle                                               | United Kingdom |
| Cristiana  | Cruceanu           | Douglas Mental Health University Institute                                 | McGill University, Montreal                                                   | Canada         |
| Piotr      | Czerski            | Psychiatric Genetic Unit                                                   | Poznan University of Medical Sciences, Poznan                                 | Poland         |
| Clarissa   | Dantas             | Department of Psychiatry                                                   | University of Campinas (Unicamp), Campinas                                    | Brazil         |

|             |                 |                                                                            |                                                                                                    |               |
|-------------|-----------------|----------------------------------------------------------------------------|----------------------------------------------------------------------------------------------------|---------------|
| Alexandre   | Daye            | Département de Psychiatrie                                                 | HUG - Hôpitaux Universitaires de Genève, Geneva                                                    | Switzerland   |
| Franziska   | Degenhardt      | Institute of Human Genetics, Department of Genomics, Life and Brain Center | University of Bonn, Bonn                                                                           | Germany       |
| Maria       | Del Zompo       | Unit of Clinical Pharmacology, Hospital University Agency                  | University of Cagliari, Cagliari                                                                   | Italy         |
| J. Raymond  | DePaulo         | Department of Psychiatry and Behavioral Sciences                           | Johns Hopkins University, Baltimore, MD                                                            | United States |
| Sevilla D.  | Detera-Wadleigh | Human Genetics Branch                                                      | National Institute of Mental Health Intramural Research Program, Bethesda, MD                      | United States |
| Bruno       | Etain           | Inserm U955, Psychiatrie Génétique                                         | Créteil                                                                                            | France        |
| Peter       | Falkai          | Department of Psychiatry and Psychotherapy                                 | Ludwig-Maximilians-University Munich, Munich                                                       | Germany       |
| Louise      | Frisén          | Department of Molecular Medicine and Surgery                               | Karolinska Institutet and Center for Molecular Medicine, Karolinska University Hospital, Stockholm | Sweden        |
| Mark A.     | Frye            | Department of Psychiatry and Psychology                                    | Mayo Clinic, Rochester, MN                                                                         | United States |
| Jan         | Fullerton       | Mental Illness (Schofield Group)                                           | Neuroscience Research Australia, Sydney                                                            | Australia     |
| Sébastien   | Gard            | Service de psychiatrie                                                     | Hôpital Charles Perrrens, Bordeaux                                                                 | France        |
| Julie       | Garnham         | Department of Psychiatry                                                   | Dalhousie University, Halifax, Nova Scotia                                                         | Canada        |
| Fernando S. | Goes            | Department of Psychiatry and Behavioral Sciences                           | Johns Hopkins University, Baltimore, MD                                                            | United States |

|             |                      |                                                                                                                            |                                                                               |               |
|-------------|----------------------|----------------------------------------------------------------------------------------------------------------------------|-------------------------------------------------------------------------------|---------------|
| Maria       | Grigoroiu-Serbanescu | Biometric Psychiatric Genetics Research Unit                                                                               | Alexandru Obregia Psychiatric Hospital, Bucharest                             | Romania       |
| Paul        | Grof                 | Mood Disorders Center of Ottawa                                                                                            |                                                                               | Canada        |
| Oliver      | Gruber               | Department of Psychiatry and Psychotherapy                                                                                 | Georg-August University Göttingen, Göttingen                                  | Germany       |
| Ryota       | Hashimoto            | Molecular Research Center for Children's Mental Development, United Graduate School of Child Development, Osaka University | Osaka University, Osaka                                                       | Japan         |
| Joanna      | Hauser               | Psychiatric Genetic Unit                                                                                                   | Poznan University of Medical Sciences, Poznan                                 | Poland        |
| Urs         | Heilbronner          | Department of Psychiatry and Psychotherapy                                                                                 | Georg-August University Göttingen, Göttingen                                  | Germany       |
| Rebecca     | Hoban                | Department of Psychiatry                                                                                                   | University of California San Diego                                            | United States |
| Per         | Hoffmann             | Institute of Human Genetics, Department of Genomics, Life and Brain Center                                                 | University of Bonn, Bonn                                                      | Germany       |
| Liping      | Hou                  | Human Genetics Branch                                                                                                      | National Institute of Mental Health Intramural Research Program, Bethesda, MD | United States |
| Stéphane    | Jamain               | Inserm U955, Psychiatrie Génétique                                                                                         | Créteil                                                                       | France        |
| Esther      | Jiménez              | Bipolar Disorders Program, Institute of Neuroscience, Hospital Clinic                                                      | University of Barcelona, IDIBAPS, CIBERSAM, Barcelona, Catalonia              | Spain         |
| Jean-Pierre | Kahn                 | Service de Psychiatrie et Psychologie Clinique                                                                             | Centre Hospitalier Universitaire de Nancy, Nancy                              | France        |
| Layla       | Kassem               | Human Genetics Branch                                                                                                      | National Institute of Mental Health Intramural Research Program, Bethesda, MD | United States |

|           |                  |                                                             |                                                                                                    |               |
|-----------|------------------|-------------------------------------------------------------|----------------------------------------------------------------------------------------------------|---------------|
| Tadafumi  | Kato             | Laboratory for Molecular Dynamics of Mental Disorders       | RIKEN Brain Science Institute, Saitama                                                             | Japan         |
| John R.   | Kelsoe           | Department of Psychiatry                                    | University of California San Diego, San Diego, CA                                                  | United States |
| Sarah     | Kittel-Schneider | Department of Psychiatry, Psychosomatics, and Psychotherapy | University of Würzburg, Würzburg                                                                   | Germany       |
| Sebastian | Kliwicky         | Department of Adult Psychiatry                              | Poznan University of Medical Sciences, Poznan                                                      | Poland        |
| Po-Hsiu   | Kuo              | Institute of Epidemiology and Preventive Medicine           | National Taiwan University, Taipei                                                                 | Taiwan        |
| Ichiro    | Kusumi           | Department of Psychiatry                                    | Hokkaido University Graduate School of Medicine, Sapporo                                           | Japan         |
| Gonzalo   | Laje             | Human Genetics Branch                                       | National Institute of Mental Health Intramural Research Program, Bethesda, MD                      | United States |
| Catharina | Lavebratt        | Department of Molecular Medicine and Surgery                | Karolinska Institutet and Center for Molecular Medicine, Karolinska University Hospital, Stockholm | Sweden        |
| Marion    | Leboyer          | Assistance Publique-Hôpitaux de Paris                       | Hôpital Albert Chenevier - Henri Mondor, Pôle de Psychiatrie, Créteil                              | France        |
| Susan G.  | Leckband         | Department of Pharmacy                                      | VA San Diego Healthcare System, San Diego, CA,                                                     | United States |
| Carlos A. | López Jaramillo  | Department of Psychiatry                                    | University of Antioquia, Medellín, Medellín                                                        | Colombia      |
| Glenda    | MacQueen         | Department of Psychiatry                                    | University of Calgary, Calgary                                                                     | Canada        |
| Mario     | Maj              | Department of Psychiatry                                    | University of Naples, SUN, Naples                                                                  | Italy         |

|            |            |                                                                                                                      |                                                                                                    |                |
|------------|------------|----------------------------------------------------------------------------------------------------------------------|----------------------------------------------------------------------------------------------------|----------------|
| Mirko      | Manchia    | Department of Biomedical Sciences                                                                                    | University of Cagliari, Cagliari                                                                   | Italy          |
| Lina       | Martinsson | Department of Molecular Medicine and Surgery                                                                         | Karolinska Institutet and Center for Molecular Medicine, Karolinska University Hospital, Stockholm | Sweden         |
| Takuya     | Masui      | Department of Psychiatry                                                                                             | Hokkaido University Graduate School of Medicine, Sapporo                                           | Japan          |
| Michael J. | McCarthy   | Department of Psychiatry                                                                                             | VA San Diego Healthcare System, San Diego, CA,                                                     | United States  |
| Francis J. | McMahon    | Human Genetics Branch                                                                                                | National Institute of Mental Health Intramural Research Program, Bethesda, MD                      | United States  |
| Philip B.  | Mitchell   | School of Psychiatry                                                                                                 | University of New South Wales, and Black Dog Institute, Sydney                                     | Australia      |
| Marina     | Mitjans    | Department of Biologia Animal, Unitat d'Antropologia, Facultat de Biologia, Universitat de Barcelona, IBUB, CIBERSAM | Instituto de Salud Carlos III, Barcelona, Catalonia                                                | Spain          |
| Francis    | Mondimore  | Department of Psychiatry and Behavioral Sciences                                                                     | Johns Hopkins University, Baltimore, MD                                                            | United States  |
| Palmiero   | Monteleone | Department of Psychiatry                                                                                             | University of Naples, SUN, Naples                                                                  | Italy          |
| Audrey     | Nallet     | Department of Mental Health and Psychiatry                                                                           | Hôpitaux Universitaires de Genève, Geneva                                                          | Switzerland    |
| Markus     | Nöthen     | Institute of Human Genetics, Department of Genomics, Life and Brain Center                                           | University of Bonn, Bonn                                                                           | Germany        |
| Tomás      | Novák      | Prague Psychiatric Center and 3rd Faculty of Medicine                                                                | Charles University, Prague                                                                         | Czech Republic |
| Urban      | Ösby       | Department of Molecular Medicine and Surgery                                                                         | Karolinska Institutet and Center for Molecular Medicine, Karolinska University Hospital, Stockholm | Sweden         |

|           |                    |                                                             |                                                                                                    |               |
|-----------|--------------------|-------------------------------------------------------------|----------------------------------------------------------------------------------------------------|---------------|
| Norio     | Ozaki              | Department of Psychiatry                                    | Nagoya University Graduate School of Medicine, Nagoya                                              | Japan         |
| Roy H.    | Perlis             | Department of Psychiatry                                    | Massachusetts General Hospital and Harvard Medical School, Boston, MA                              | United States |
| Andrea    | Pfennig            | Department of Psychiatry and Psychotherapy                  | University Hospital Carl Gustav Carus, Technische Universität Dresden, Dresden                     | Germany       |
| Paola     | Piccardi           | Department of Biomedical Sciences                           | University of Cagliari, Cagliari                                                                   | Italy         |
| James B.  | Potash             | Department of Psychiatry                                    | University of Iowa, Iowa City, IA                                                                  | United States |
| Daniela   | Reich-<br>Erkelenz | Department of Psychiatry and Psychotherapy                  | Ludwig-Maximilians-University Munich, Munich                                                       | Germany       |
| Andreas   | Reif               | Department of Psychiatry, Psychosomatics, and Psychotherapy | University of Würzburg, Würzburg                                                                   | Germany       |
| Eva       | Reininghaus        | Special outpatient center for bipolar affective disorder    | Medical University of Graz, Graz                                                                   | Austria       |
| Marcella  | Rietschel          | Department of Genetic Epidemiology in Psychiatry            | Central Institute of Mental Health, Mannheim                                                       | Germany       |
| Guy       | Rouleau            | Montreal Neurological Institute and Hospital                | McGill University, Montreal                                                                        | Canada        |
| Janusz K. | Rybakowski         | Department of Adult Psychiatry                              | Poznan University of Medical Sciences, Poznan                                                      | Poland        |
| Martin    | Schalling          | Department of Molecular Medicine and Surgery                | Karolinska Institutet and Center for Molecular Medicine, Karolinska University Hospital, Stockholm | Sweden        |
| Peter R.  | Schofield          | Mental Illness (Schofield Group)                            | Neuroscience Research Australia, Sydney                                                            | Australia     |



|           |            |                                                       |                                                                               |                |
|-----------|------------|-------------------------------------------------------|-------------------------------------------------------------------------------|----------------|
| Thomas G. | Schulze    | Department of Psychiatry and Psychotherapy            | Georg-August University Göttingen, Göttingen                                  | Germany        |
| Barbara   | Schweizer  | Department of Psychiatry and Behavioral Sciences      | Johns Hopkins University, Baltimore, MD                                       | United States  |
| Florian   | Seemüller  | Department of Psychiatry and Psychotherapy            | Ludwig-Maximilians-University Munich, Munich                                  | Germany        |
| Giovanni  | Severino   | Department of Biomedical Sciences                     | University of Cagliari, Cagliari                                              | Italy          |
| Lisa R.   | Seymour    | Department of Psychiatry                              | Mayo Clinic, Rochester, MN                                                    | United States  |
| Claire    | Slaney     | Department of Psychiatry                              | Dalhousie University, Halifax, Nova Scotia                                    | Canada         |
| Jordan W. | Smoller    | Department of Psychiatry                              | Massachusetts General Hospital and Harvard Medical School, Boston, MA         | United States  |
| Alessio   | Squassina  | Department of Biomedical Sciences                     | University of Cagliari, Cagliari                                              | Italy          |
| Thomas    | Stamm      | Department of Psychiatry and Psychotherapy            | Charité - Universitätsmedizin Berlin, Campus Charité Mitte, Berlin            | Germany        |
| Jo        | Steele     | Human Genetics Branch                                 | National Institute of Mental Health Intramural Research Program, Bethesda, MD | United States  |
| Pavla     | Stopkova   | Prague Psychiatric Center and 3rd Faculty of Medicine | Charles University, Prague                                                    | Czech Republic |
| Sarah     | Tighe      | Department of Psychiatry                              | University of Iowa, Iowa City, IA                                             | United States  |
| Alfonso   | Tortorella | Department of Psychiatry                              | University of Naples, SUN, Naples                                             | Italy          |

|           |         |                                                                       |                                                                  |               |
|-----------|---------|-----------------------------------------------------------------------|------------------------------------------------------------------|---------------|
| Gustavo   | Turecki | Douglas Mental Health University Institute                            | McGill University, Montreal                                      | Canada        |
| Eduard    | Vieta   | Bipolar Disorders Program, Institute of Neuroscience, Hospital Clinic | University of Barcelona, IDIBAPS, CIBERSAM, Barcelona, Catalonia | Spain         |
| Naomi R.  | Wray    | The University of Queensland, Queensland Brain Institute              | Brisbane, Queensland                                             | Australia     |
| Adam      | Wright  | School of Psychiatry                                                  | University of New South Wales, and Black Dog Institute, Sydney   | Australia     |
| L. Trevor | Young   | Department of Psychiatry                                              | University of British Columbia, Vancouver                        | Canada        |
| Peter P.  | Zandi   | Department of Mental Health                                           | Johns Hopkins Bloomberg School of Public Health, Baltimore, MD   | United States |
